# Supplementary material for: Red blood cell mannoses as phagocytic ligands mediating both sickle cell anaemia and malaria resistance
Source: PubMed Central journal article supplement (PMC7979802; doi:10.1038/s41467-021-21814-z), 2021-03-19
Supplement: 41467_2021_21814_MOESM1_ESM.pdf [file 41467_2021_21814_MOESM1_ESM.pdf]

# 1 Cao et al: Supplementary Tables and Figures

## 2 Supplementary Table 1: Exclusion of possible lectin binding artefacts for HbSS RBCs.

| Potential artefact                         | Exclusion                                                                                                                                                                                                                                                                                                                                    |
|--------------------------------------------|----------------------------------------------------------------------------------------------------------------------------------------------------------------------------------------------------------------------------------------------------------------------------------------------------------------------------------------------|
| <u>Binding artefact</u>                    |                                                                                                                                                                                                                                                                                                                                              |
| Non-specific binding of GNA lectin         | <ul style="list-style-type: none"> <li>• Wide lectin panel show specificity (Figure 1A)</li> <li>• NPL highly correlates with GNA across all samples (Supplementary Fig. 1A)</li> <li>• Mannan blockade (Supplementary Fig. 1B)</li> <li>• Wide non-SCD panel as well as HbAA, HbAS show negative binding (Supplementary Fig. 1C)</li> </ul> |
| Non-specific binding of sickle cells       | Little binding with Annexin V (Supplementary Fig. 1D, E)                                                                                                                                                                                                                                                                                     |
| Sickle cells permeable to lectins          | Lack of binding with, intracellular antibodies, BRIC-132/163 (Supplementary Fig. 1F)                                                                                                                                                                                                                                                         |
| O-GlcNAc detection instead of high mannose | No surface binding to RL2 antibody, specific for O-GlcNAc. (Supplementary Fig. 1G for oxidized RBC and Supplementary Fig. 1H for HbSS RBC)                                                                                                                                                                                                   |
| <u>Phenotype artefact</u>                  |                                                                                                                                                                                                                                                                                                                                              |
| Reticulocytosis                            | Lack of expression on non-SCD RBCs showing reticulocytosis (Supplementary Fig. 1I, J).                                                                                                                                                                                                                                                       |
| Sickling process                           | Morphological independence by microscopy and flow cytometry (Fig. 3A)                                                                                                                                                                                                                                                                        |
| Intravascular haemolysis                   | LDH independence (Fig. 2D-F)                                                                                                                                                                                                                                                                                                                 |

3

4

5

6

7

8

9

10 **Supplementary Table 2.** Proteomic LC-MS analysis of 260kDa band cut from SDS-PAGE of  
 11 ghosts from healthy (HbAA) RBCs. Proteins included are with minimum: 99.5% probability, 3  
 12 peptides identified, and 5.0% sequence coverage. Common contaminants (e.g. keratins and  
 13 trypsin) have been removed. Identified proteins (UniProt accession, entry codes and description)  
 14 were sorted based on the number of sequence coverage (%Cov). MW, molecular weight in Da;  
 15 PLGS score, ProteinLynx Global Server score.

16  
 17

| Accession | Entry       | Description                                                                       | MW     | PLGS score | Prob. (%) | Peptides | %Cov |
|-----------|-------------|-----------------------------------------------------------------------------------|--------|------------|-----------|----------|------|
| P02549    | SPTA1_HUMAN | Spectrin alpha chain, erythrocytic 1 OS=Homo sapiens                              | 279840 | 9.9        | 100.0     | 125      | 53.5 |
| P11277    | SPTB1_HUMAN | Spectrin beta chain, erythrocytic OS=Homo sapiens                                 | 246313 | 9.9        | 100.0     | 46       | 26.6 |
| P02730    | B3AT_HUMAN  | Band 3 anion transport protein OS=Homo sapiens                                    | 101727 | 9.9        | 100.0     | 14       | 19.0 |
| P16157    | ANK1_HUMAN  | Ankyrin-1 OS=Homo sapiens                                                         | 206136 | 9.9        | 100.0     | 25       | 17.0 |
| P11166    | GTR1_HUMAN  | Solute carrier family 2, facilitated glucose transporter member 1 OS=Homo sapiens | 54048  | 9.9        | 100.0     | 3        | 6.3  |

18

19 **Supplementary Table 3.** Proteomic analysis of F40 trypsin resistant gel band identified  $\alpha$ -spectrin  
 20 peptides (accession P02549, entry SPTA1\_HUMAN), sorted on intensities. Peak MW, molecular  
 21 weight of the protonated (MH<sup>+</sup>) peptide found in Da; peptide MW, theoretical molecular weight  
 22 of the protonated (MH<sup>+</sup>) peptide in Da; delta, difference between peak MW and peptide MW in  
 23 ppm; score, PLGS score. In peptide sequence, cysteine (C) amino acids in **bold** and underlined  
 24 correspond to carboxymethylated cysteine amino acid.

25  
 26

| Peak MW<br>(MH <sup>+</sup> ) | Peptide<br>MW<br>(MH <sup>+</sup> ) | Delta<br>(ppm) | Score | Sequence |      | Sequence                                                                 | Intensity |
|-------------------------------|-------------------------------------|----------------|-------|----------|------|--------------------------------------------------------------------------|-----------|
|                               |                                     |                |       | Start    | End  |                                                                          |           |
| 1550.795                      | 1550.795                            | 0.08           | 6.8   | 280      | 292  | IKEKEPVLTSEDY                                                            | 317025    |
| 1135.598                      | 1135.599                            | -1.18          | 6.6   | 293      | 303  | GKDLVASEGLF                                                              | 226142    |
| 643.359                       | 643.356                             | 4.36           | 6.3   | 54       | 58   | HLQVF                                                                    | 146116    |
| 1245.657                      | 1245.659                            | -1.14          | 6.1   | 270      | 279  | KRDVTEAIQW                                                               | 119871    |
| 1203.611                      | 1203.612                            | -0.93          | 5.6   | 59       | 68   | KRDADDLGKW                                                               | 34163     |
| 1164.551                      | 1164.553                            | -2.02          | 5.5   | 82       | 91   | EDPTNIQGKY                                                               | 63659     |
| 1263.555                      | 1263.556                            | -0.65          | 5.4   | 164      | 173  | VQEC <u>AD</u> ILEW                                                      | 66792     |
| 852.448                       | 852.446                             | 1.73           | 5.2   | 364      | 370  | EKLQATY                                                                  | 23647     |
| 966.491                       | 966.489                             | 2.03           | 5.1   | 2362     | 2370 | QALAEGKSY                                                                | 1717      |
| 5788.926                      | 5788.981                            | -9.48          | 4.8   | 1869     | 1920 | AVHETRVQNV <u>CA</u><br>QGEDILNKVLQEES<br>QNKEISSKIEALNE<br>KTPSLAKAIAAW | 3774      |
| 802.330                       | 802.337                             | -8.22          | 4.8   | 2413     | 2419 | TNSYFGN                                                                  | 5889      |
| 1603.711                      | 1603.739                            | -17.40         | 4.8   | 902      | 914  | QQYLADLHEAET<br>W                                                        | 6290      |
| 2193.952                      | 2193.977                            | -11.35         | 4.8   | 466      | 481  | DERHRQYEQ <u>CL</u> DF<br>HLF                                            | 1892      |
| 2065.934                      | 2066.004                            | -33.71         | 4.7   | 1944     | 1963 | IADKETSLSKTNGN<br>GADLGDF                                                | 6335      |
| 950.372                       | 950.392                             | -21.38         | 4.6   | 1090     | 1097 | EAGDMLEW                                                                 | 1078      |
| 3284.517                      | 3284.539                            | -6.43          | 4.5   | 1385     | 1410 | EKRKKILDQ <u>C</u> LEL<br>QMFQGN <u>C</u> DQVES<br>W                     | 2553      |
| 2727.342                      | 2727.442                            | -36.73         | 4.4   | 1124     | 1146 | QKDLNTNEPRLRDI<br>NKVADDLLF                                              | 1109      |

27  
 28

Supplementary Fig. 1

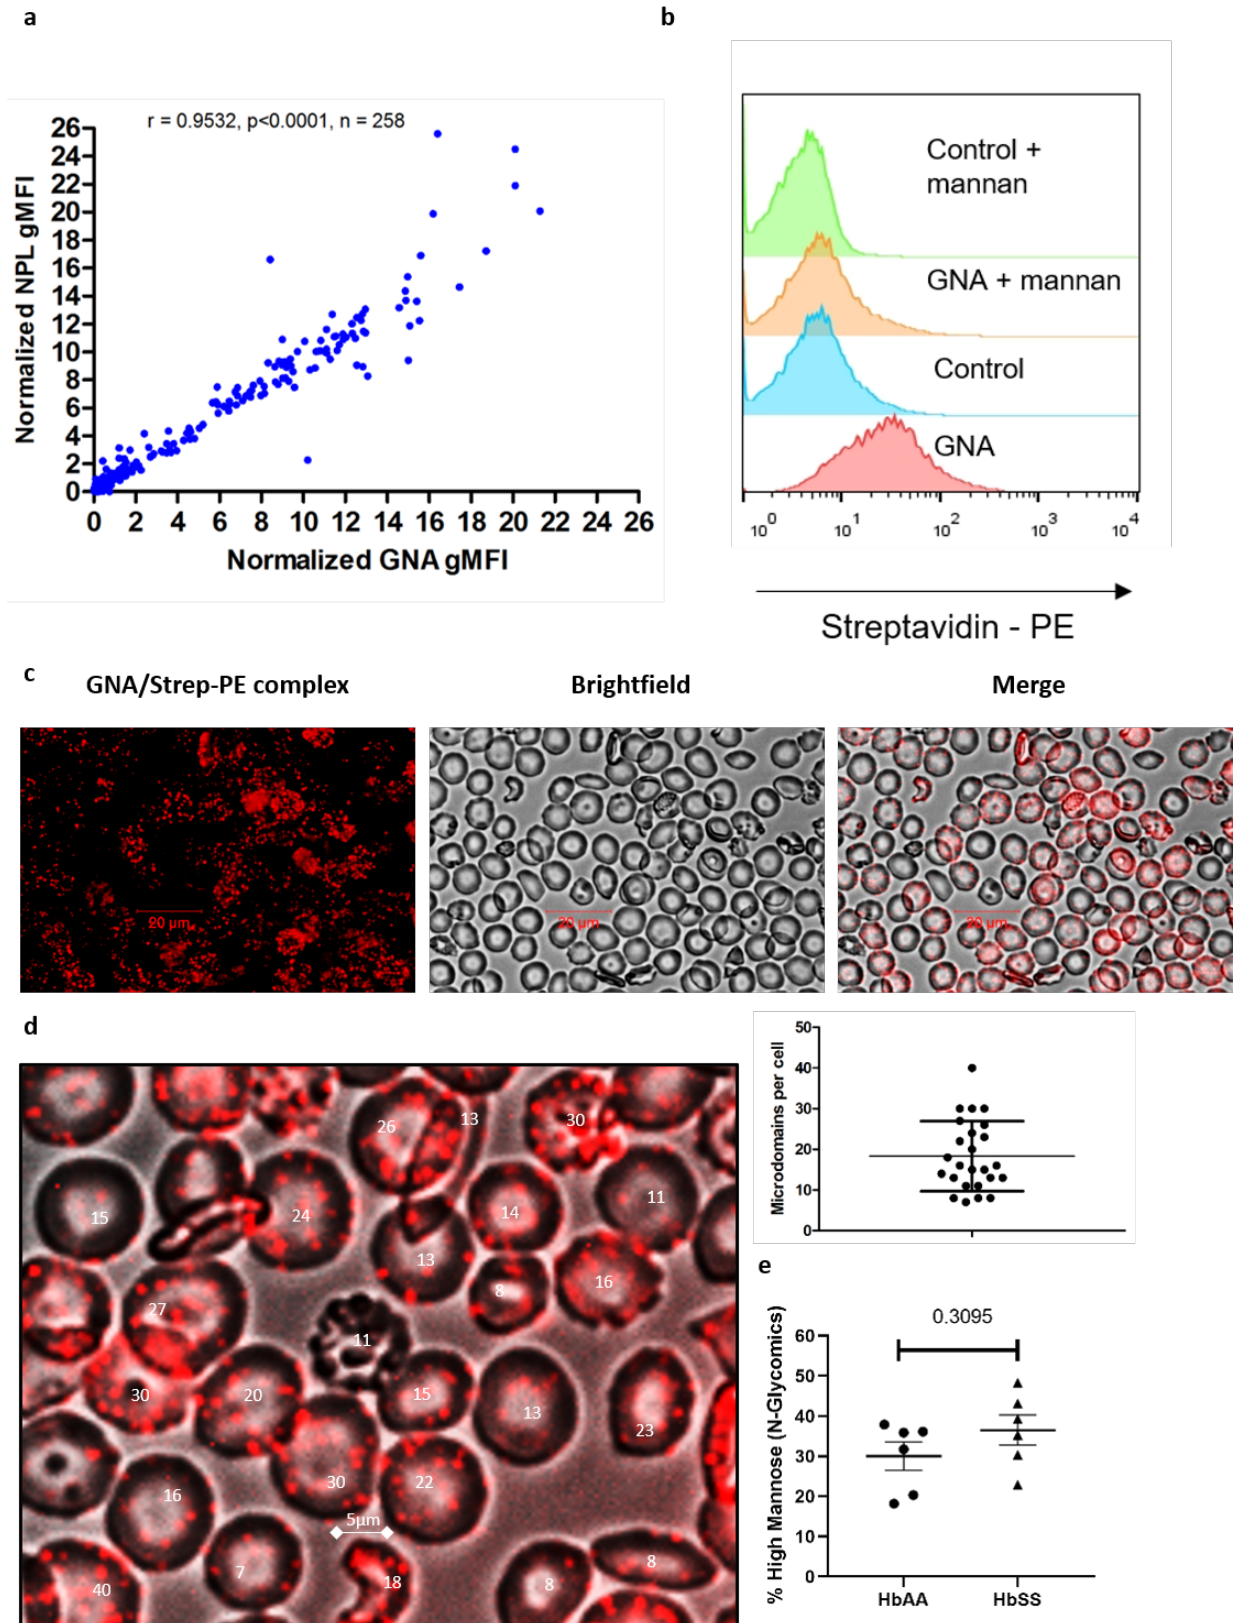

30 **Supplementary Figure 1: Specificity of binding of mannose binding lectins to RBCs.**

31 a) Correlation of *Narcissus pseudonarcissus* Lectin (NPL) with *Galanthus nivalis* Agglutinin  
32 (GNA) lectin surface binding; normalized geometric mean fluorescence (gMFI),  
33 Spearman's rank correlation.  $p=5.5 \times 10^{-135}$ ,  $n=256$ , independent lectin measurement over  
34 more than ten independent experiments.

35 b) Flow cytometric histograms of GNA lectin and streptavidin control binding for sickle cell  
36 homozygote (HbSS) RBCs with and without mannan blockade. Representative of three  
37 independent experiments from different donors.

38 c) GNA lectin/Streptavidin phycoerythrin (PE) staining of HbSS RBCs is visualized by  
39 fluorescence microscopy: PE alone, Brightfield alone and merge.

40 d) HbSS RBCs from a section of image from c) are counted for the number of GNA lectin  
41 binding patches visualized by fluorescence microscopy (left) and plotted on the right. Data  
42 shown as mean (18.3) +/- SD (8.6),  $n=25$  independent microdomains, representative of  
43 three independent experiments.

44 e) Percentage high mannose structures, with respect to total N-glycans. Untreated HbAA ( $n=$   
45 2 independent donors) and HbSS ( $n=5$  independent donors) ghosts are analysed by N-  
46 glycome mass spectrometry. Results are pooled from four independent experiments. High  
47 mannose and complex N-glycans total 100%. Data shown as median +/- IQR, 2 tailed  
48 Mann-Whitney statistical test.

Supplementary Fig. 2

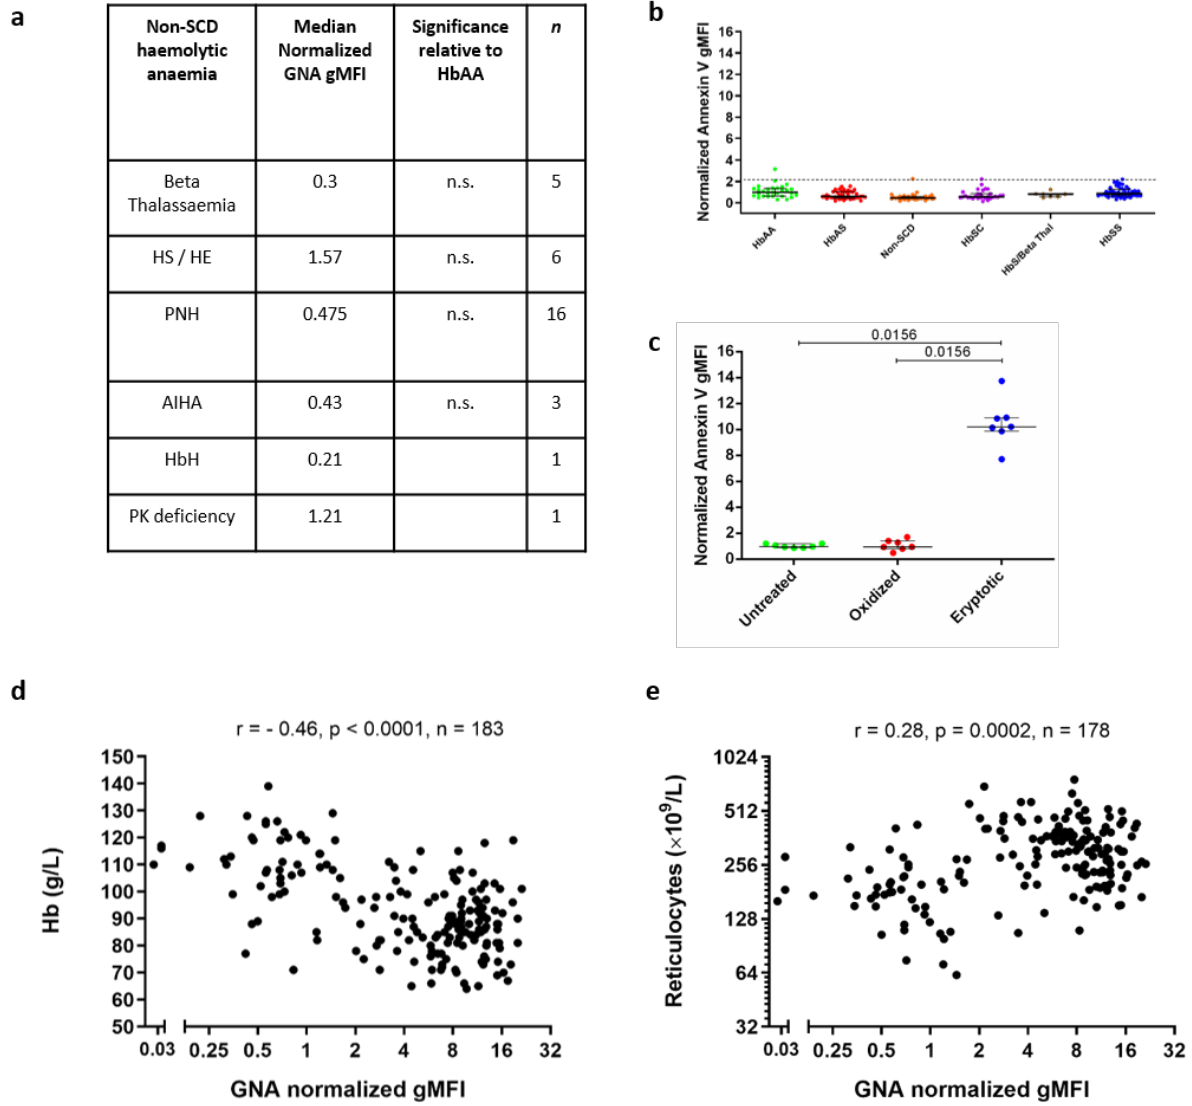

50 **Supplementary Figure 2: Binding of mannose binding lectins and annexin V to RBCs.**

- 51 a) Table of normalized geometric mean fluorescence (gMFI) values for *Galanthus nivalis*  
52 Agglutinin (GNA) lectin binding to non-sickle cell disease haemolytic anaemias, 2 tailed  
53 Mann-Whitney tests relative to healthy (HbAA) RBCs. HS/HE (hereditary spherocytosis,  
54 hereditary elliptocytosis), PNH (paroxysmal nocturnal haemoglobinuria); AIHA  
55 (autoimmune haemolytic anaemia); HbH (haemoglobin H disease); PK deficiency  
56 (pyruvate kinase deficiency).
- 57 b) Normalized gMFI of annexin V binding to RBCs in whole blood samples. Dotted line  
58 shows 90<sup>th</sup> centile of annexin V staining on healthy (HbAA) cells. Non- sickle cell disease  
59 anaemias include haemolytic conditions listed in Supplementary Fig. 2a. HbAA (n=29)  
60 sickle cell trait (HbAS)(n=42), non- sickle cell disease (n=33), compound heterozygotes  
61 for haemoglobins S and C (HbSC)(n=30), compound heterozygotes for haemoglobin S and  
62  $\beta$ -thalassaemia (HbS/Beta Thal) (n=7), homozygotes for sickle cell haemoglobin (HbSS)  
63 (n=52). No significant differences by 2 tailed Mann-Whitney. Data shown as median +/-  
64 IQR. Each data point indicates an independent RBC donor. Numerous (>10) experiments.
- 65 c) Normalized gMFI of annexin V binding to oxidized (copper sulphate/ascorbic acid),  
66 eryptotic (calcium ionophore) or untreated purified HbAA RBCs; 2 tailed Wilcoxon. Data  
67 shown as median +/- IQR. Single experiment.
- 68 d) Plots of haemoglobin concentrations, Spearman's rank,  $p=5.8 \times 10^{-11}$ ,
- 69 e) and reticulocyte counts against normalized GNA lectin gMFI for sickle cell disease  
70 including HbS/B+, HbSC (compound heterozygosity for HbS with  $\beta$ -thalassaemia and  
71 HbC respectively) and HbSS patients. Spearman's rank correlation shown (>20 different  
72 experiments).

Supplementary Fig. 3

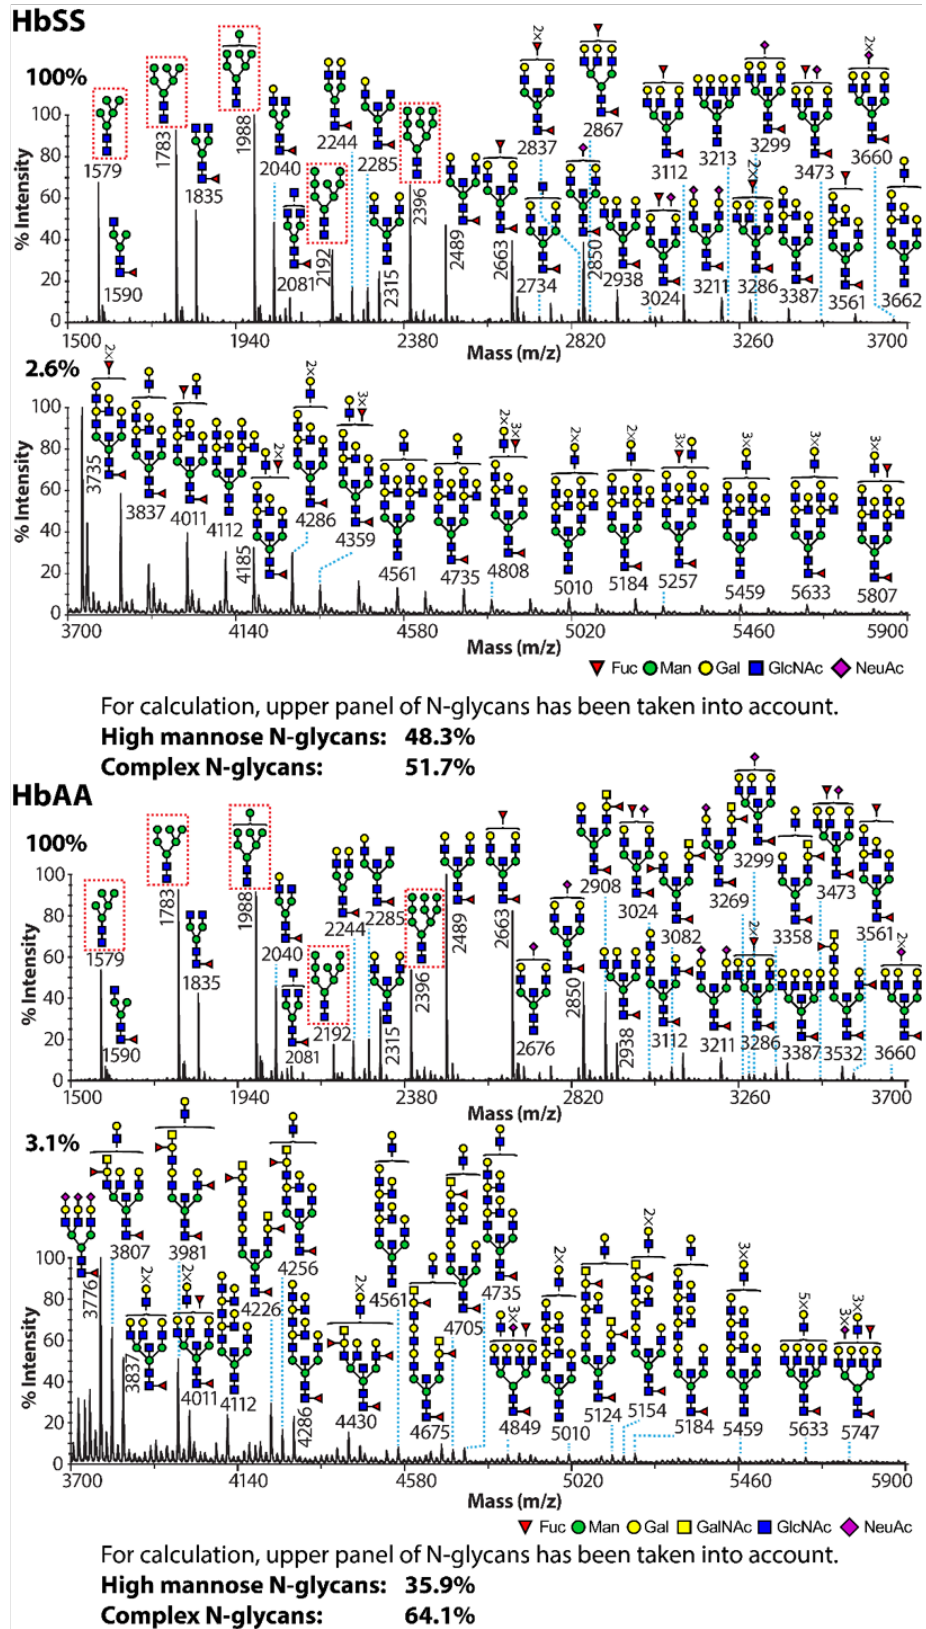



74 **Supplementary Figure 3. Full N-glycome spectra from HbSS and HbAA ghosts.**

75 Full spectra from sickle cell haemoglobin homozygote (HbSS)(upper panel) and healthy  
76 (HbAA)(lower panel) ghosts, whose partial spectra are shown in Fig. 1. Zoom factors are  
77 indicated by the percentages on top of the intensity axis. Red boxes indicate high mannoses. For  
78 calculations of percentages high mannose and complex N-glycans, the upper panel of each N-  
79 glycan profile was used.

80

81

Supplementary Fig. 4

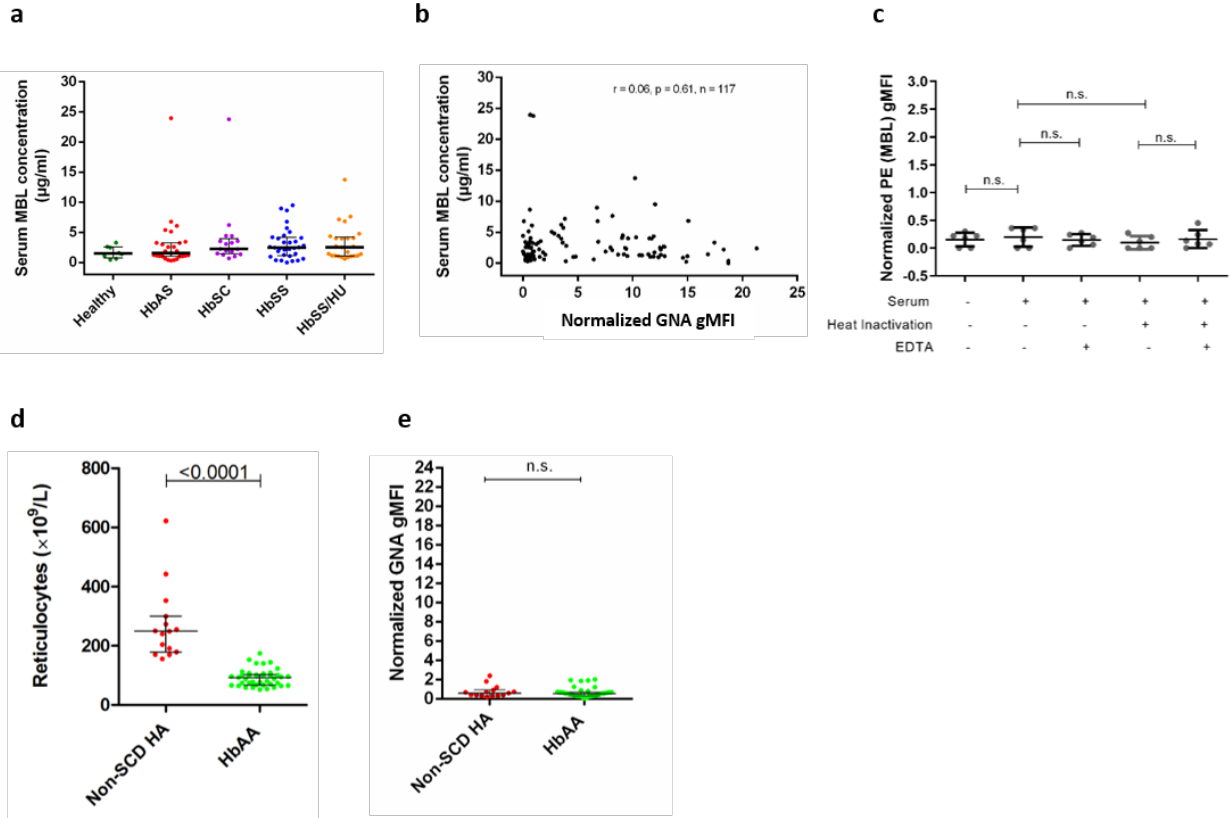

82

83

84

85

86

87

88

89

90 **Supplementary Figure 4: Mannose binding lectin correlations and stratification of mannose**  
91 **relationship to anaemia.**

92 Concentrations of serum mannose binding lectin (MBL): (a) split by clinical phenotype (healthy  
93 (HbAA)(n=8); sickle cell trait (HbAS)(n=27); heterozygotes for haemoglobins S and C  
94 (HbSC)(n=17); homozygotes for sickle cell haemoglobin (HbS)(not receiving hydroxycarbamide  
95 treatment, n=32); HbSS/HU (receiving hydroxycarbamide treatment, n=25), (b) correlation with  
96 surface *Galanthus nivalis* Agglutinin (GNA) lectin binding, Spearman's rank correlation and (c)  
97 lack of direct binding to HbSS RBCs (n=6), 2-tailed Mann-Whitney. Comparison of reticulocyte  
98 counts, (2 tailed Mann-Whitney,  $p=1.8 \times 10^{-8}$ ) (d) or normalized GNA lectin binding geometric  
99 mean fluorescence (gMFI)(2 tailed Mann-Whitney) (e) between HbAA and non-sickle cell disease  
100 haemolytic anaemias (Non-SCD HA). For d), HbAA (n=15), non-SCD (n=37). For e), HbAA  
101 (n=15), non-SCD (n=41). Each data point indicates an independent RBC donor over two or more  
102 independent experiments. Data shown as median +/- IQR. 2 tailed Mann-Whitney with exception  
103 for b)

Supplementary Fig. 5

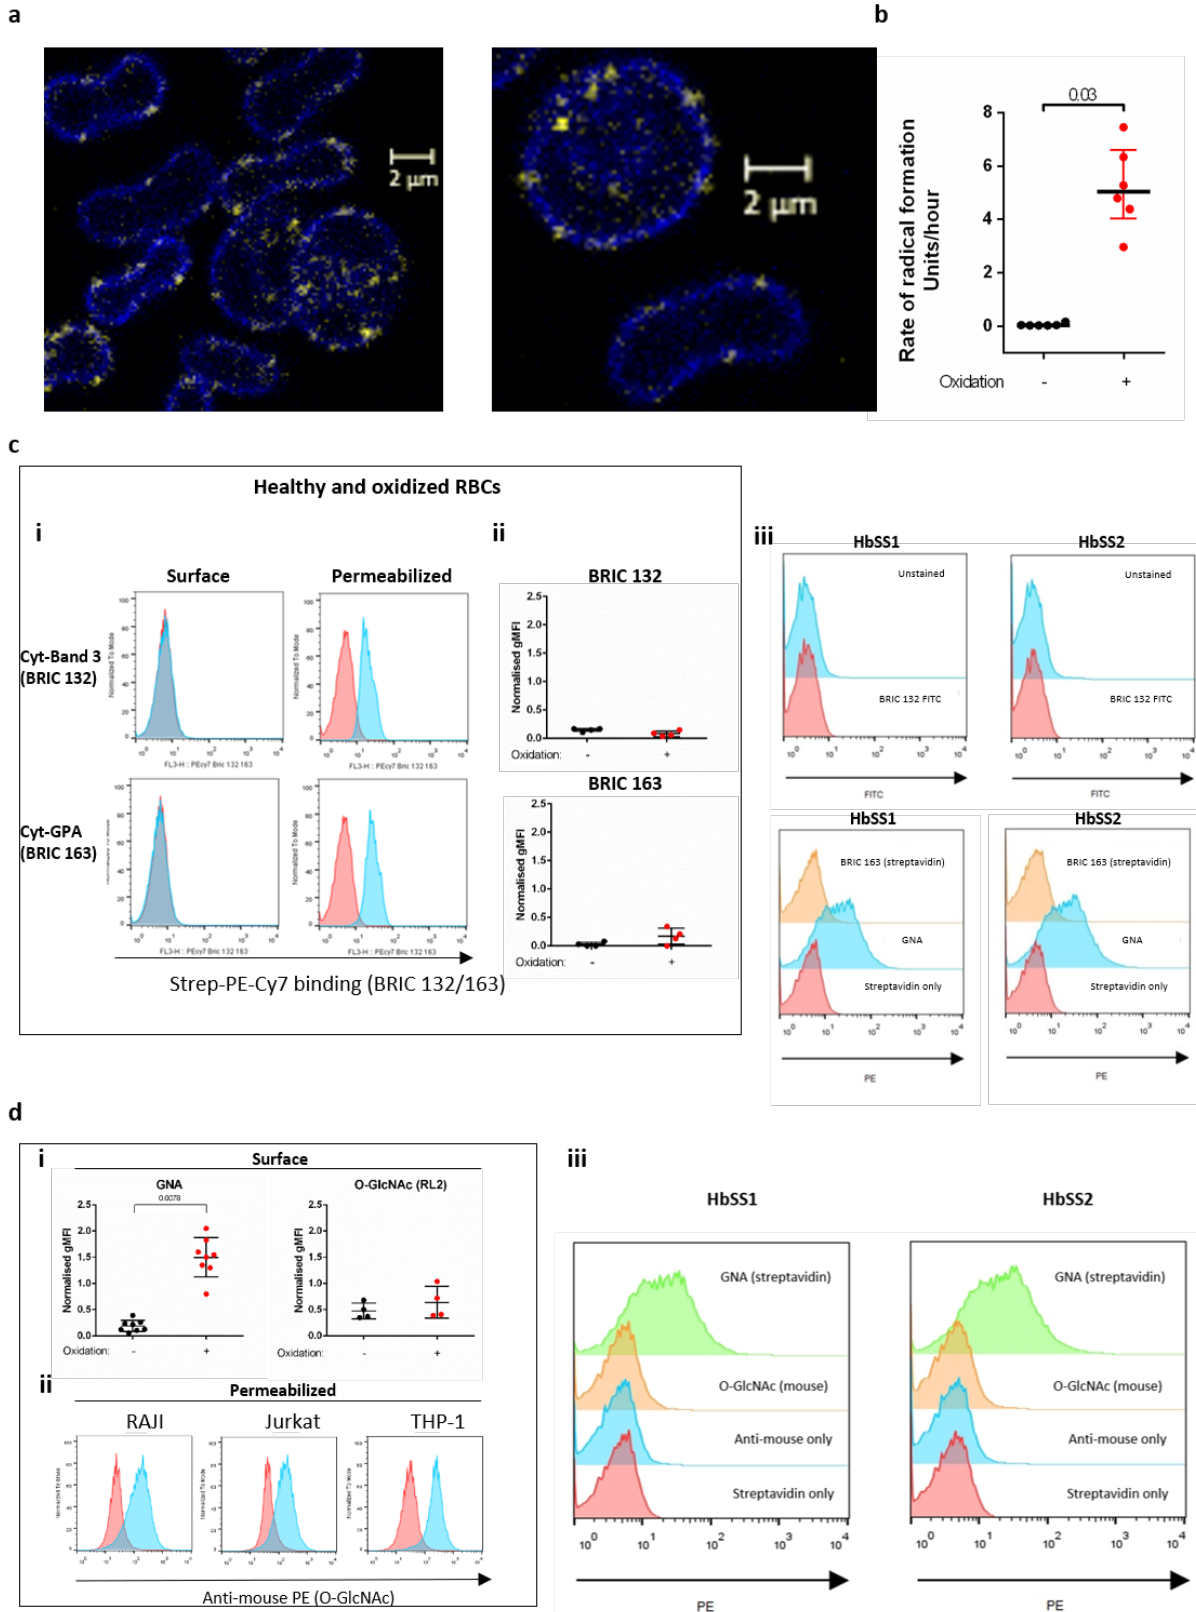

**105 Supplementary Figure 5: Oxidation exposes mannose on the surface of RBCs**

- 106 a) Confocal microscopy of healthy (HbAA) RBCs permeabilized before staining with  
107 biotinylated *Galanthus nivalis* Agglutinin (GNA) lectin, streptavidin (yellow) and anti-  
108 spectrin (blue).
- 109 b) Rate of radical formation calculated from six-hour time course measurement for healthy  
110 RBCs with or without oxidation by CuSO<sub>4</sub>/ascorbic acid during time course. 2 tailed  
111 Wilcoxon, n=6 biologically independent donors, representative of two independent  
112 experiments.
- 113 c) Flow cytometric analysis of healthy, oxidized and sickle cell haemoglobin homozygotes  
114 (HbSS) RBCs using BRIC 132 (anti-cytoplasmic band 3) or BRIC 163 (anti-cytoplasmic  
115 glycophorin A). Left hand panels: i) histograms for permeabilized versus non-  
116 permeabilized binding of HbAA RBCs to BRIC antibodies. ii) BRIC antibody binding to  
117 surfaces of oxidized and undamaged HbAA RBCs. Differences not significant by 2 tailed  
118 Wilcoxon. n=4 biologically independent donors representative of two independent  
119 experiments. Right hand panel (iii): BRIC antibody and GNA lectin binding to RBCs from  
120 two HbSS donors, without permeabilization.
- 121 d) Flow cytometric analysis of healthy, oxidized and HbSS RBC using O-GlcNAc specific  
122 antibody, RL2. i) Normalized GNA lectin (n=8) and RL2 (n=4) binding for undamaged  
123 and oxidized RBCs, without permeabilization. Each point represents a biologically  
124 independent donor representative of two independent experiments. ii) Histograms for RL2  
125 binding to permeabilized nucleated cells shown. Right hand panel (iii): RL2 antibody and  
126 GNA lectin binding to RBCs from two HbSS donors, without permeabilization. All 2  
127 tailed Wilcoxon.

Supplementary Fig. 6

Two-toned fluorescence phagocytosis (TTFP) assay

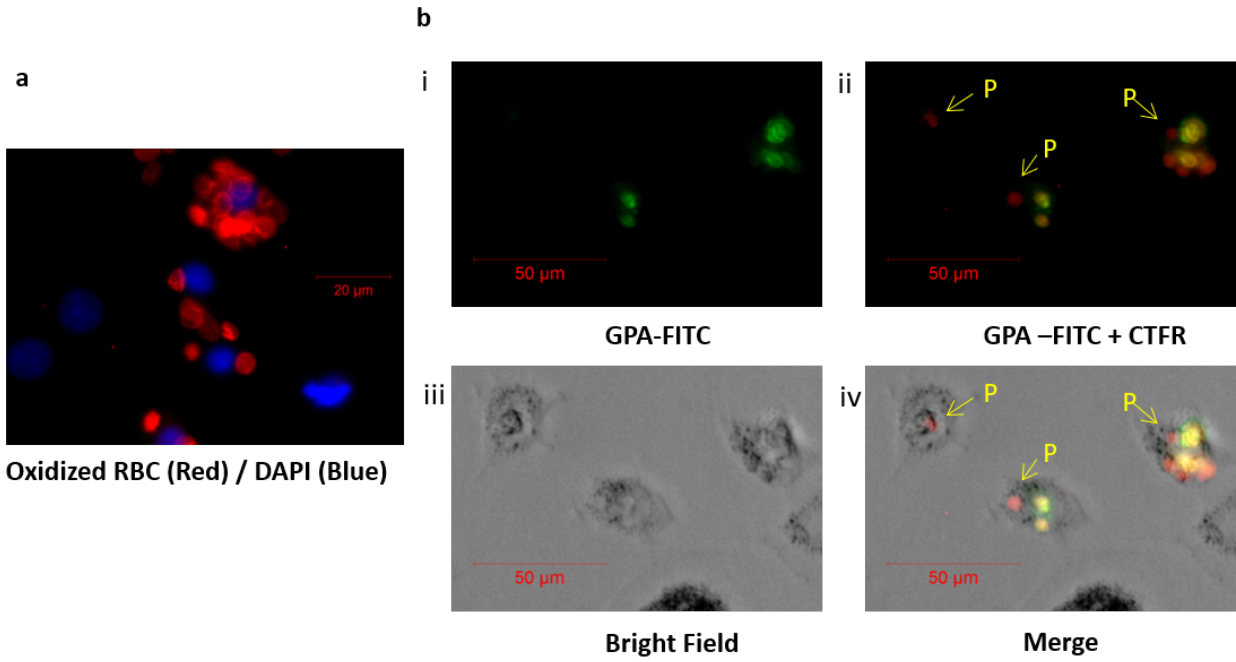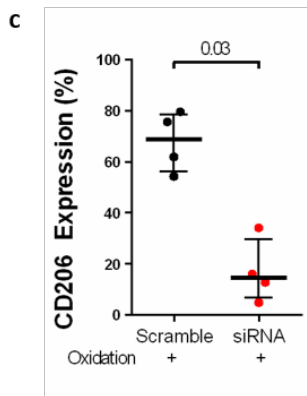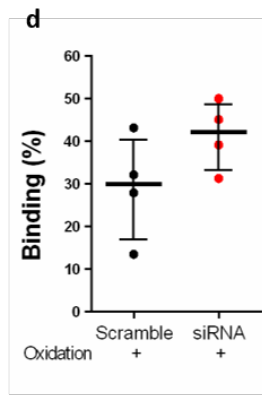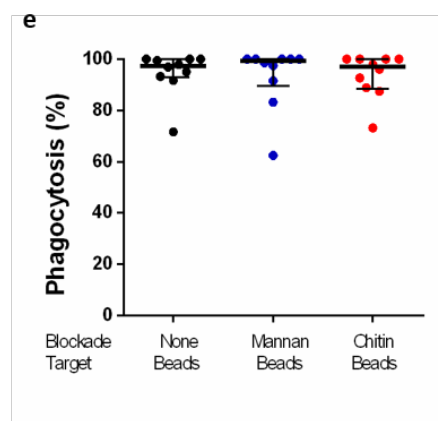

129 **Supplementary Figure 6: Two-toned fluorescence phagocytosis (TTFP) assay**

130 a) Oxidized RBCs stained with Cell Trace Far Red (CTFR, red) are incubated with human  
131 monocyte derived macrophages (HMDM) for 3 hours, washed with phosphate buffered  
132 saline (PBS), permeabilized and stained for nucleus (DAPI, blue). Immunofluorescence.  
133 Scale bar shown.

134 b) Oxidized RBCs stained with Cell Trace Far Red (CTFR, red) are incubated with HMDM  
135 for 3 hours, washed with PBS, and counter-stained prior to immunofluorescence  
136 microscopy with anti-GPA-FITC antibody (green) to identify RBCs that are not  
137 sequestered inside macrophages: GPA-FITC only (i), GPA-FITC and CTFR (ii), bright  
138 field only (iii) and merged (iv). CTFR (red) single positive cells are counted as having been  
139 phagocytosed (letter E). Double positive (CTFR and GPA) cells are not counted as having  
140 been phagocytosed, but bound to the macrophage cell surface. Scale bar 50  $\mu\text{m}$  scale as  
141 shown.

142 c) Mannose receptor (CD206) expression assessed by microscopy for human monocyte  
143 derived macrophages treated with siRNA or scramble control. 2 tailed Mann-Whitney, n=4  
144 biologically independent RBC donors over two independent experiments.

145 d) Percentage surface binding of sickle cell haemoglobin homozygote (HbSS) RBCs assessed  
146 by microscopy for human monocyte derived macrophages treated with siRNA or scramble  
147 control. 2 tailed Mann-Whitney, n=4 biologically independent RBC donors over two  
148 independent experiments.

149 e) Quantified phagocytosis of beads by HMDM with and without glycan polymer blockade,  
150 applied in the same way and the same concentration as for RBC phagocytosis experiments.

151 2 tailed Mann-Whitney, n=10 biologically independent PBMC donors for HMDM over  
152 three independent experiments.



Supplementary Fig. 7

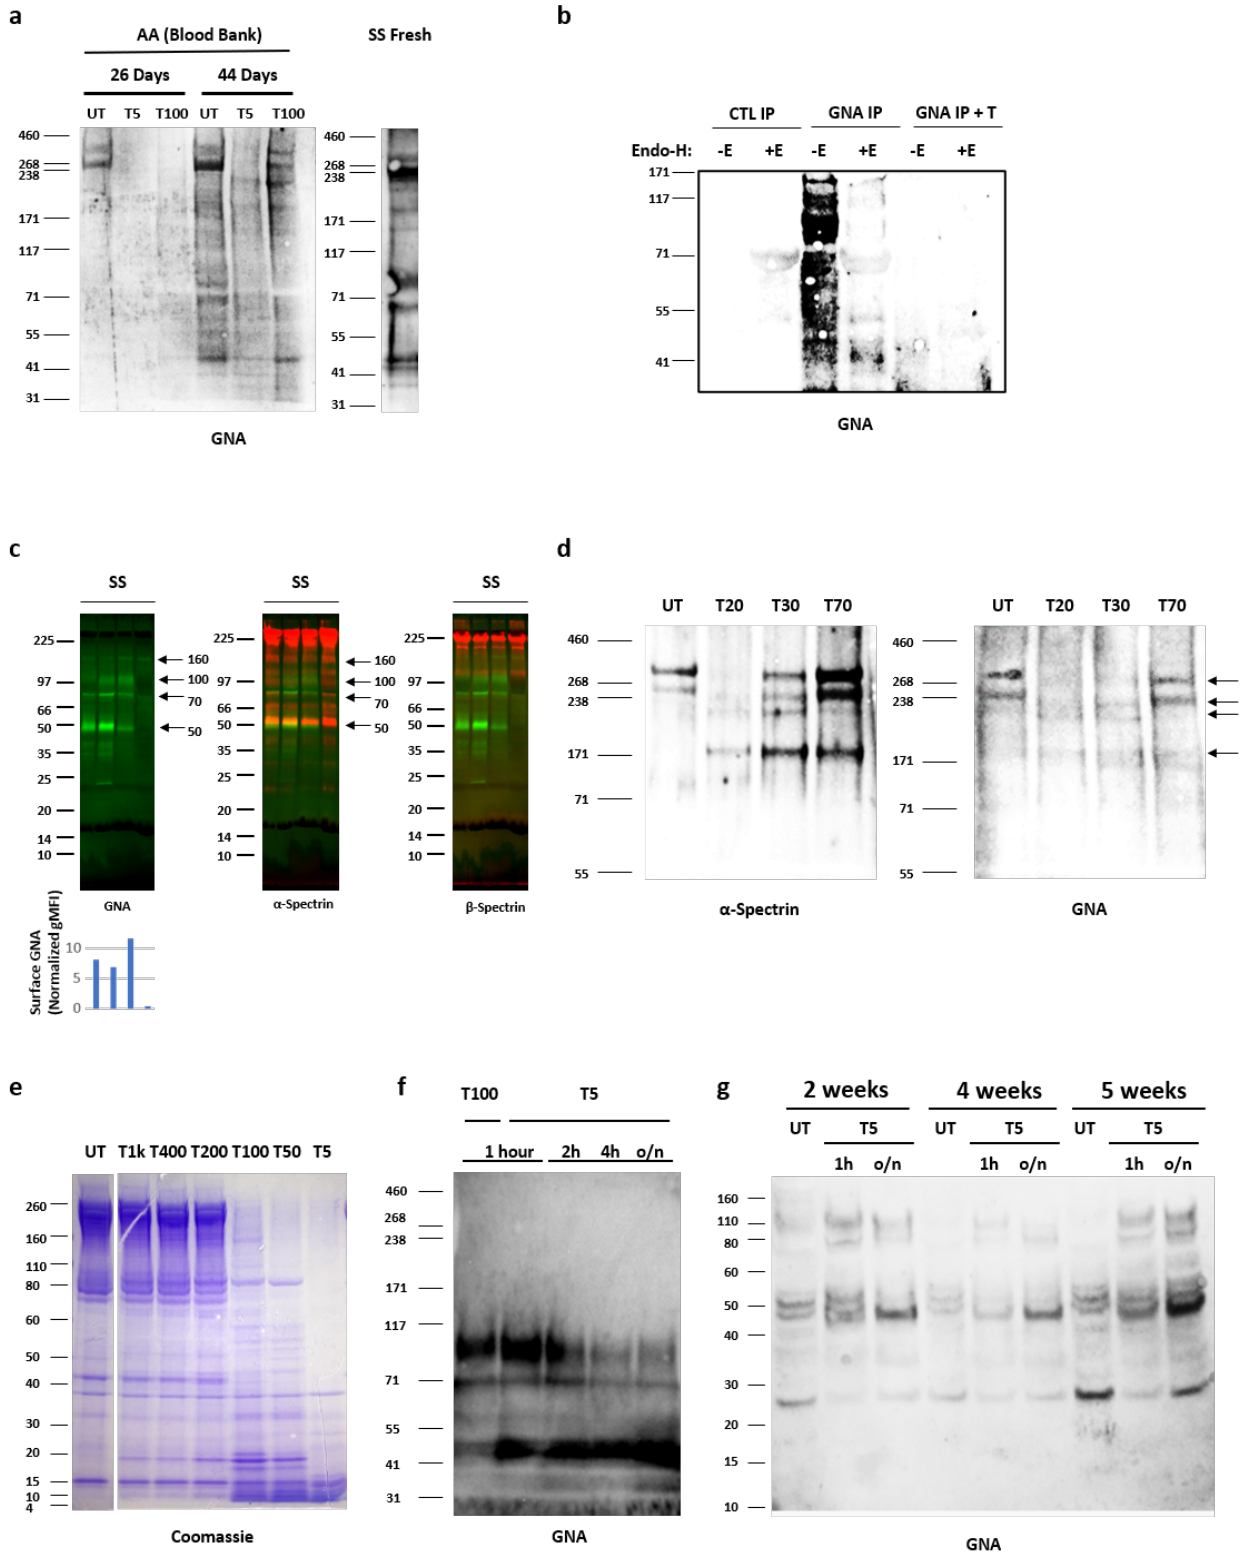

153

154

155 **Supplementary Figure 7: High mannose positive fragments derived from aging and**  
156 **proteolysis**

- 157 a) *Galanthus nivalis* Agglutinin (GNA) lectin western from healthy (HbAA) ghosts isolated  
158 from erythrocytes stored from 26 to 44 days. T5 and T100 indicate trypsin digestion of  
159 ghosts, where the number indicates the dilution factor of trypsin. Comparison sickle cell  
160 haemoglobin homozygote (HbSS) GNA lectin blot is shown, demonstrating  
161 correspondence in the positions of the ~160kDa, ~100kDa, ~70kDa and ~50kDa  
162 fragments.
- 163 b) Stored RBC (>40 days) ghosts are Triton treated and subjected to GNA lectin precipitation  
164 or control (no lectin) precipitation. Endo-H (+E) or control digestion (-E) is applied to the  
165 eluates. Overnight trypsin treatment is also applied to a subset of GNA  
166 immunoprecipitation (IP) elution (GNA IP + T), prior to Endo-H or control digestions.
- 167 c) Dual colour western blot from HbSS ghosts using GNA lectin (green) with either  $\alpha$ -spectrin  
168 or  $\beta$ -spectrin antibodies (both red). Below are corresponding surface FACS GNA lectin  
169 staining (normalized geometric mean fluorescence (gMFI)). N.B. The 8-18% gradient gel  
170 used here does not yield bright 260kDa GNA lectin binding bands.
- 171 d) Partial trypsin digestion of HbAA ghosts (T70 indicates 1:70 ratio of trypsin to sample,  
172 etc) then blotted with polyclonal  $\alpha$ -spectrin antibody or GNA lectin.
- 173 e) Coomassie stain of spectrin released from HbSS ghosts after digestion with trypsin for one  
174 hour. Untreated (UT), Tx indicates the dilution factor of trypsin relative to spectrin  
175 material.
- 176 f) GNA lectin blot of HbSS ghost after prolonged trypsin treatment from 1 hour to overnight  
177 (20hours).

- 178 g) GNA lectin blot of ghosts made from HbSS erythrocytes aged from 2 to 5 weeks. Untreated  
179 (UT), one hour (1h) and overnight (o/n) high concentration trypsin digestions (T5).

Supplementary Fig. 8

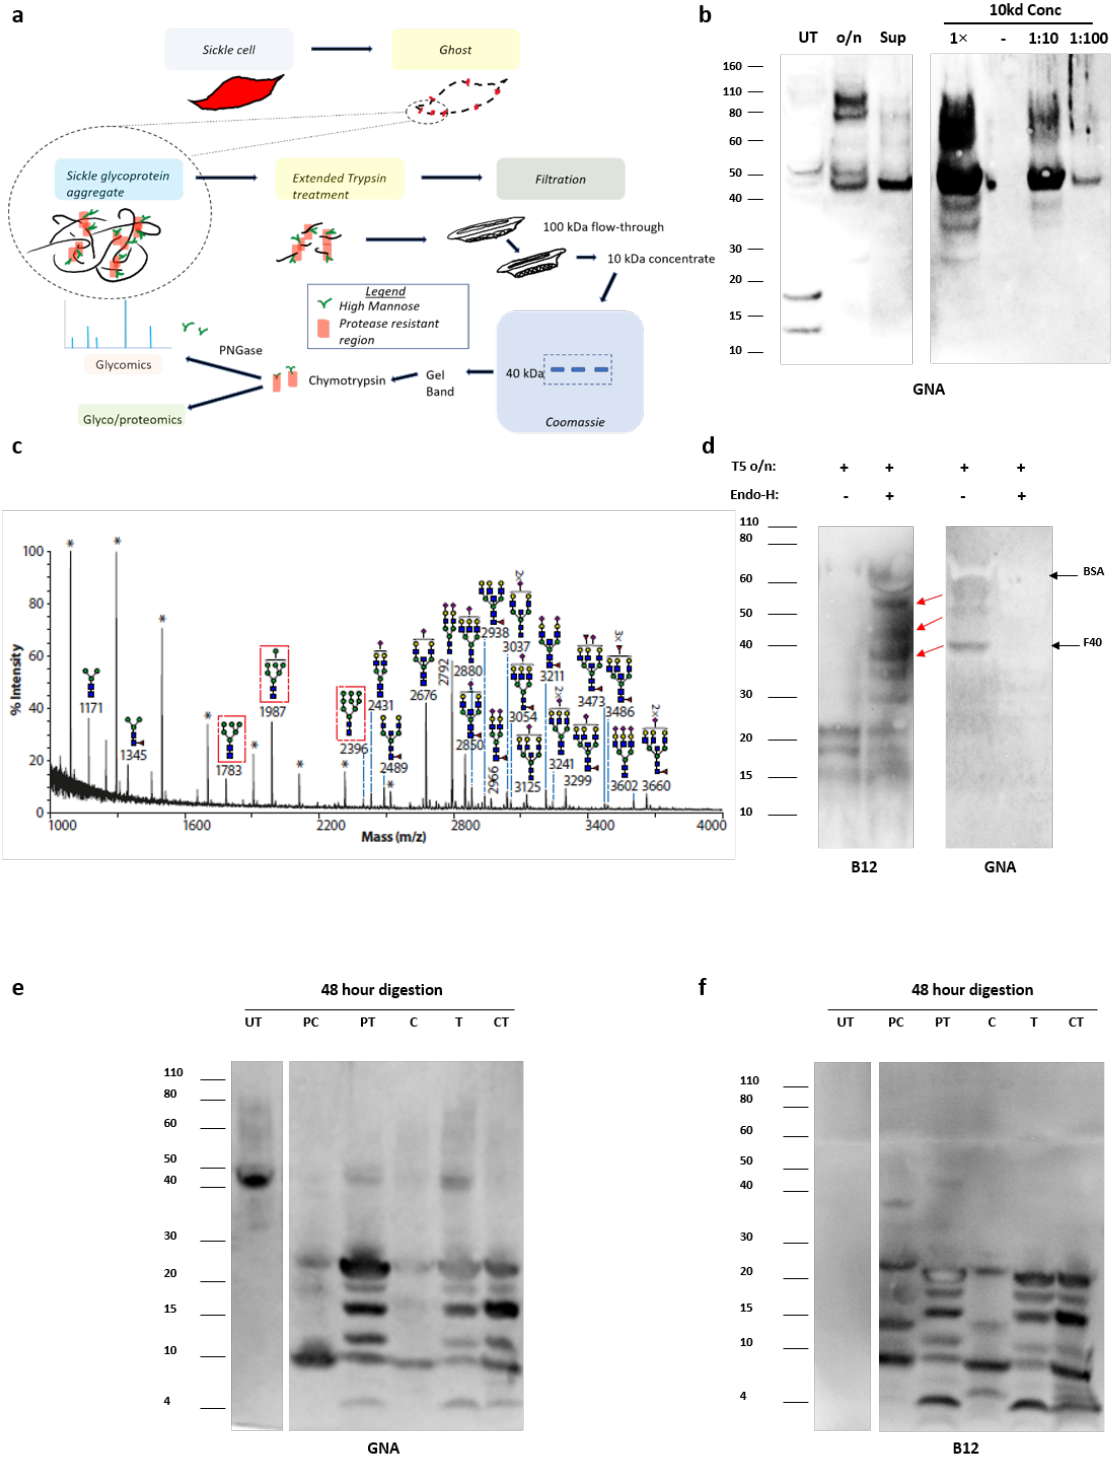

180

181

182

**183 Supplementary Figure 8: Purification and analysis of protease resistant F40 from sickle cells.**

184 a) Cartoon outlining purification process for peptide F40. Sickle cells (top right) are used to  
185 make RBC ghosts, which are then subjected to prolonged incubation with trypsin before  
186 removing the ghosts by centrifugation. The supernatant is then passed through a 100 kDa  
187 filter and concentrated on a 10 kDa filter before running on a polyacrylamide gel. The ~40  
188 kDa band is cut out and digested with chymotrypsin (then PNGase) before analysis by mass  
189 spectrometry for glycopeptides (and glycans).

190 b) *Galanthus nivalis* Agglutinin (GNA) lectin blot of enrichment process of F40 from aged  
191 homozygote sickle cell haemoglobin (HbSS) erythrocyte ghosts. Untreated (UT);  
192 overnight T5 (o/n); supernatant from heat inactivated o/n sample (Sup). Final product from  
193 sequential concentration with 100kDa and 10kDa concentrators is shown as 1×, 1:10 and  
194 1:100 dilution series. See explanatory notes below.

195 c) Glycomic analysis following PNGase release of N-linked glycans from F40. Red boxes  
196 indicate high mannoses. Putative structures based on composition, tandem MS and  
197 biosynthetic pathways. All ions are  $[M+Na]^+$ . Peaks annotated with an asterisk (\*) do not  
198 correspond to glycan structures. Major structures are annotated for clarity.

199 d) HbSS 10kDa concentrate (from a) was digested with trypsin (T5) overnight, heat  
200 inactivated, then digested with Endo-H or control for 24 hours. GNA lectin and B12  
201 western blots. Red arrows show likely migration of GNA lectin and B12 reactive bands.  
202 Black arrows indicate contaminating BSA and position of F40.

203 e) HbSS 10kDa concentrate (from a) subjected to combinatorial protease digestion in mild  
204 denaturing conditions over 48 hours. Western blot with GNA lectin. (UT) untreated, (PC)  
205 pepsin 24 hours then chymotrypsin 24 hours, (PT) pepsin 24 hours then trypsin 24 hours,

206 (C) chymotrypsin 48 hours, (T) trypsin 48 hours, (CT) chymotrypsin 24 hours then trypsin  
207 24 hours, with heat inactivation at 24 hours.

208 f) As d) but with western blotting using antibody B12.

209 **Purification and properties of F40:** F40 from overnight trypsin digestion of HbSS RBC  
210 ghosts partitions to the supernatant following heat inactivation (a). We thereby concentrated  
211 F40, through sequential 100kDa and 10kDa cut off concentrators, by approximately 50-fold  
212 (a). This preparation exhibited remarkably high GNA lectin binding, approximately 100-fold  
213 greater than full length spectrin. Sufficient F40 was purified for glycoproteomic analysis.  
214 PNGase released glycans including three high mannoses, a tri-mannose structure and other  
215 complex glycans (b). The Endo-H sensitive nature of F40 GNA lectin binding restricts the  
216 GNA lectin ligands within this pool of structures to the high mannoses:  $\text{Man}_6\text{GlcNAc}_2$ ,  
217  $\text{Man}_8\text{GlcNAc}_2$  and  $\text{Man}_9\text{GlcNAc}_2$ . GNA lectin reactivity to F40 shows partial sensitivity to  
218 digestion with chymotrypsin and proteomic analysis of this digest showed the main protein  
219 represented was  $\alpha$ -spectrin (Fig. 4i). The most abundant peptides came from the N-terminal  
220 370 amino acids, spanning spectrin repeats 1 to 3, with only scattered, low abundance peptides  
221 identified from the rest of the molecule and none from  $\beta$ -spectrin. Excluding mass  
222 spectrometry incompatible regions from this region yielded 34% coverage across spectrin  
223 repeats 1 to 3, with 64% coverage within repeat 3.

224 Identification of the N-terminal portion of  $\alpha$ -spectrin as a major constituent of F40 from mass  
225 spectrometry analysis was also supported by western blotting using B12, an N-terminus  
226 specific  $\alpha$ -spectrin antibody. The antibody does not bind GNA lectin reactive F40 or two higher  
227 molecular weight bands directly, but epitopes are revealed by removal of high mannoses using  
228 Endo-H (c). Furthermore, three new B12-binding bands migrated at a slightly lower positions

229 relative to the three GNA lectin binding bands, consistent with glycosidase induced cleavages  
230 (c). 48 hour-long digestions with combinations of proteases were able to cleave F40 and, even  
231 without Endo-H treatment, unmask B12-binding epitopes (e). The GNA lectin and B12-  
232 binding fragments align remarkably well under all treatment combinations (d, e). These data  
233 suggest the high mannose decoration and unusual protein structure of F40 limits antibody  
234 access and may account for its resistance to proteases.

Supplementary Fig. 9

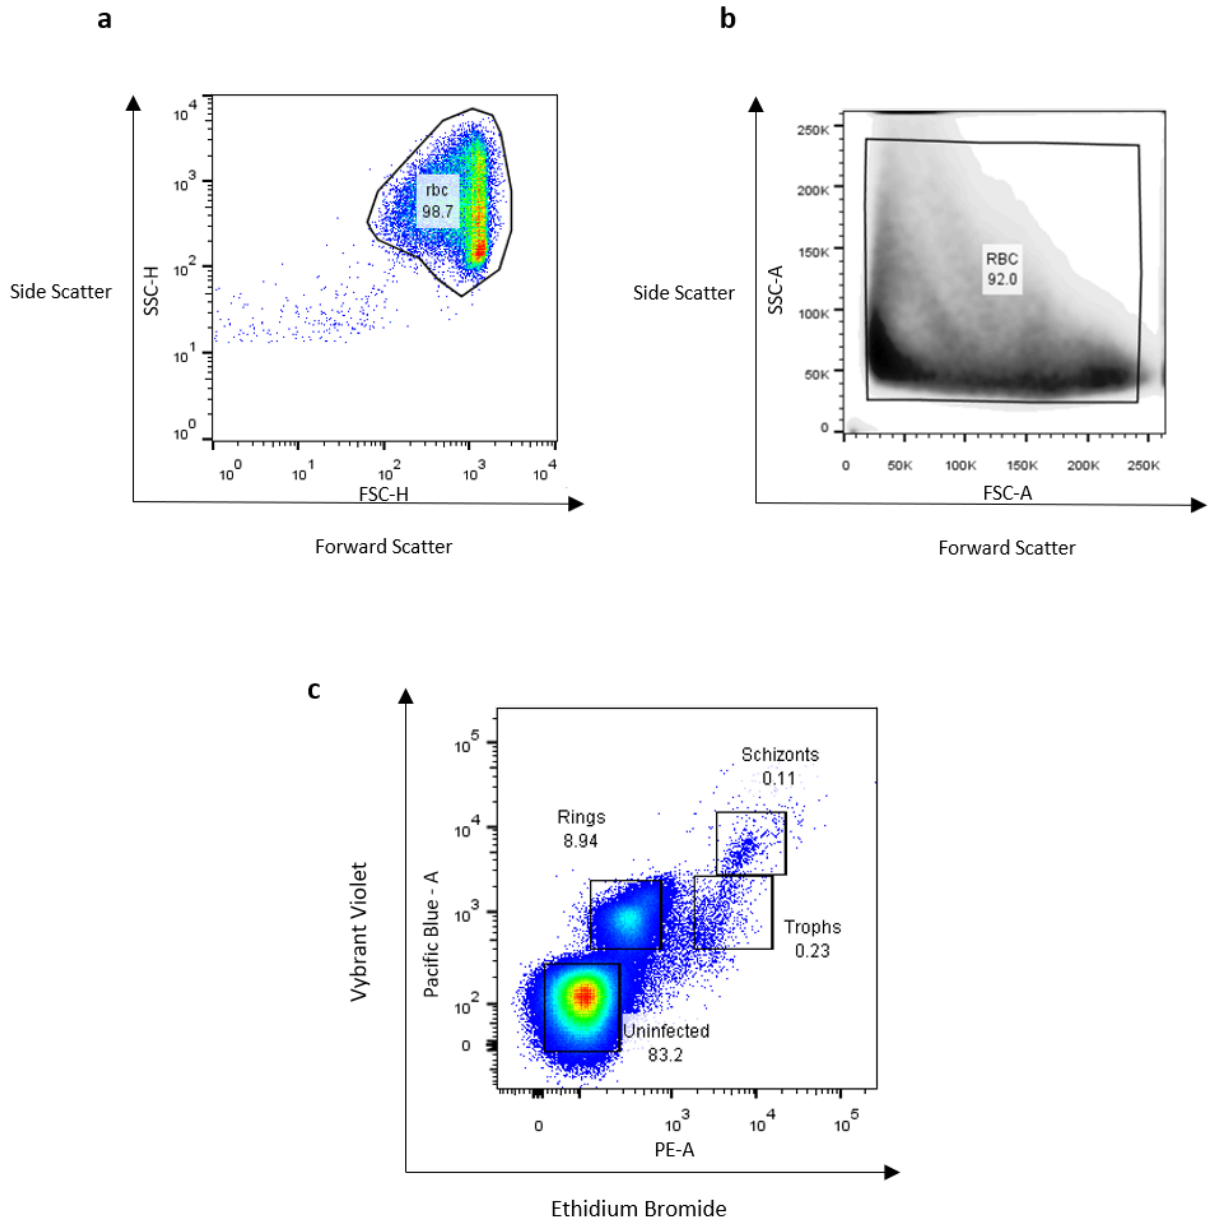

235

236

237

238

239

240



241 **Supplementary Figure 9. Gating strategy for flow cytometric analysis.**

- 242 a) Example of gating strategy for selecting whole red blood cells used in both whole blood  
243 and purified RBC flow cytometry (with the exception of *P. falciparum* infected RBC  
244 flow cytometry). Applies to all flow cytometry related data with exception for Fig 5c-d.
- 245 b) Example of first gating of whole red blood cells used in analysis of *P. falciparum*  
246 infected RBC flow cytometry. Applies to Fig. 5c-d.
- 247 c) Example of second gating of *P. falciparum* infected RBCs by maturation stages as  
248 defined by ethidium bromide (PE) and Vybrant Violet (Pacific Blue) staining. Applies to  
249 Fig. 5c-d.
- 250
